# Supplementary material
Source: PubMed Central journal article supplement (PMC539752)

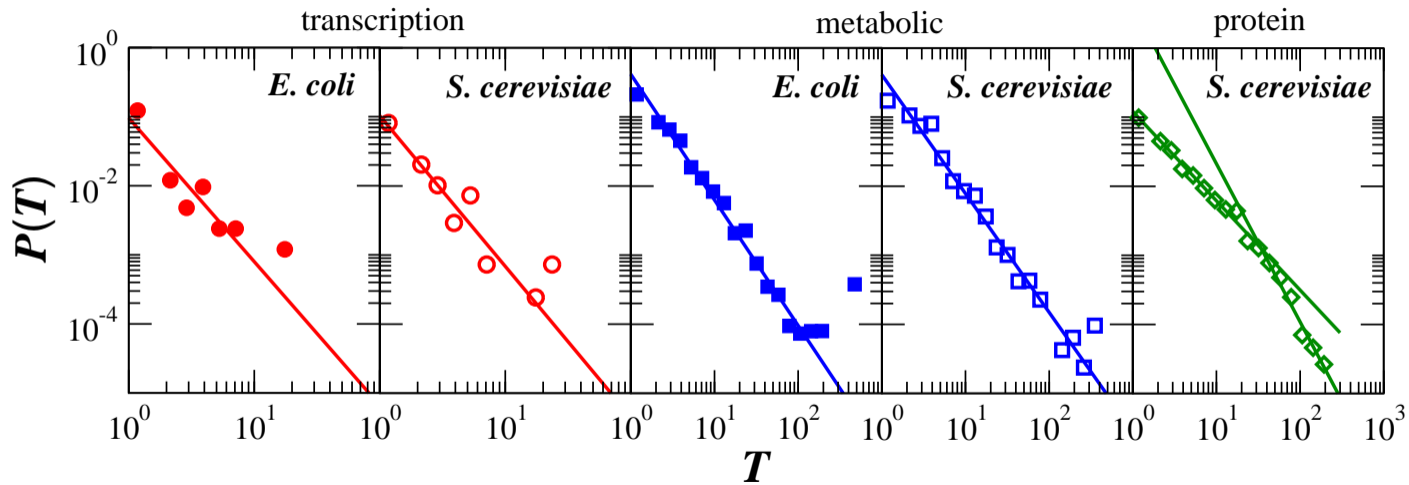

Supplement: pnas_101_52_17940__1.pdf [file pnas_101_52_17940__1.pdf]

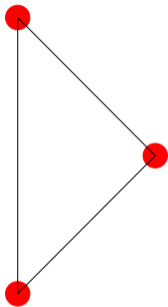

$$g_{31} = 1/3$$

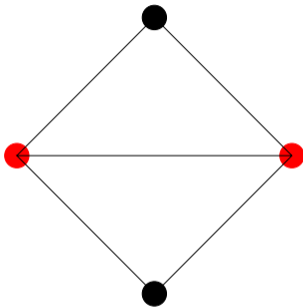

$$g_{42} = 1/2$$

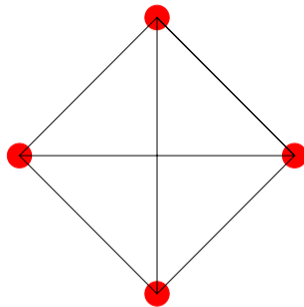

$$g_{43} = 1/4$$

Supplement: pnas_101_52_17940__2.pdf [file pnas_101_52_17940__2.pdf]

**a)**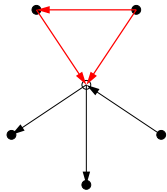**b)**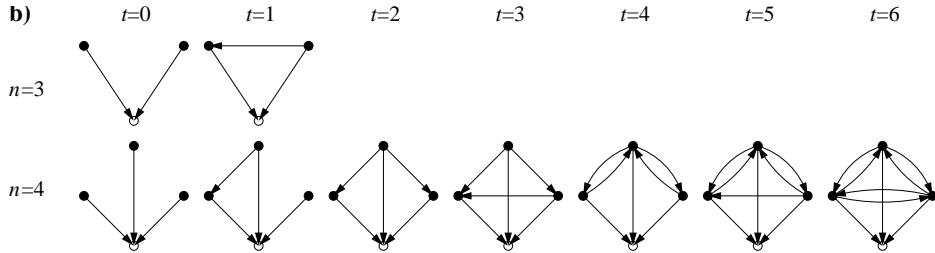

Supplement: pnas_101_52_17940__3.pdf [file pnas_101_52_17940__3.pdf]

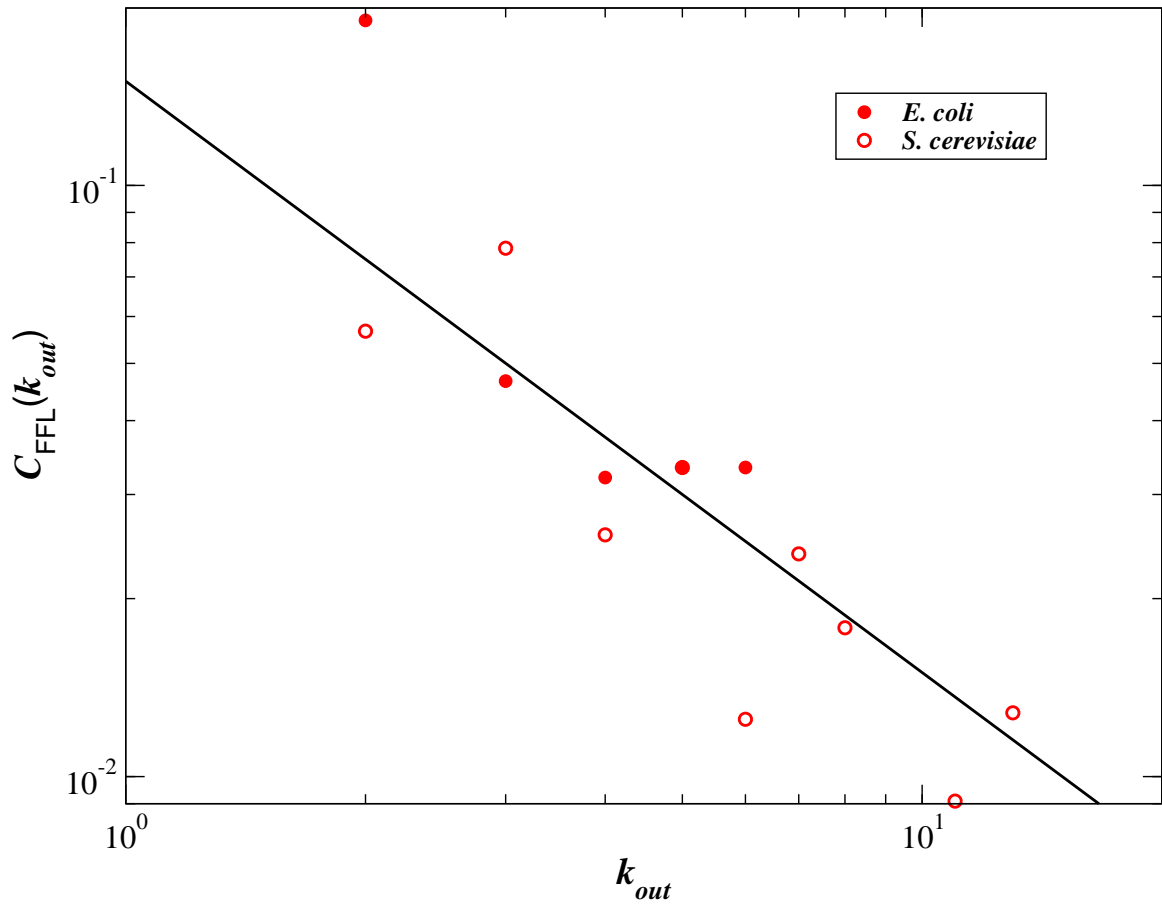

Supplement: pnas_101_52_17940__4.pdf [file pnas_101_52_17940__4.pdf]

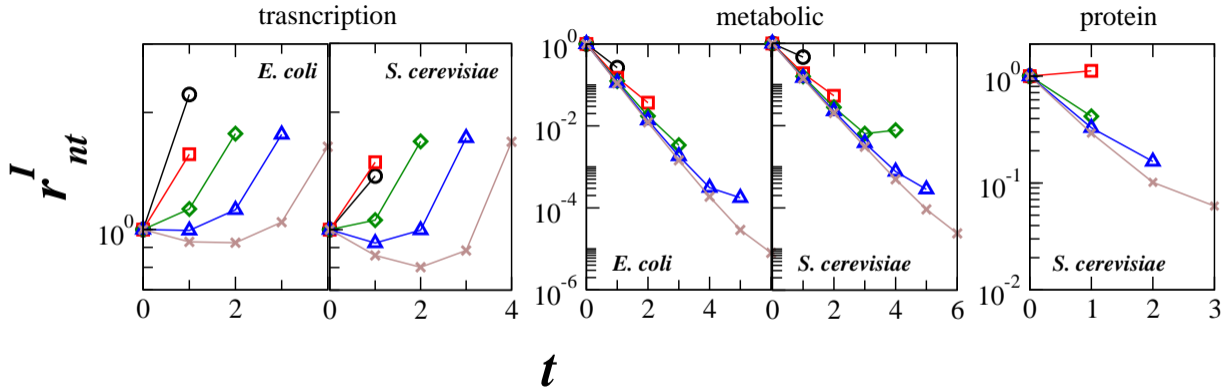

Supplement: pnas_101_52_17940__5.pdf [file pnas_101_52_17940__5.pdf]
